# Supplementary material for: Development and application of ReaxFF methodology for understanding the chemical dynamics of metal carbonates in aqueous solutions
Source: Royal Society of Chemistry journal article supplement (doi:10.1039/d1cp04790f), 2022-01-01
Supplement: d1cp04790f1.pdf [file d1cp04790f1.pdf]

## Development and Application of ReaxFF Methodology for Understanding the Chemical Dynamics of Metal Carbonates in Aqueous Solutions

Nabankur Dasgupta<sup>1</sup>, Chen Chen<sup>2</sup>, Adri C.T. van Duin<sup>1,2,3,\*</sup>

<sup>1</sup>Department of Engineering Science and Mechanics, The Pennsylvania State University, University Park, PA, 16802

<sup>2</sup>Department of Chemical Engineering, The Pennsylvania State University, University Park, PA, 16802

<sup>3</sup>Department of Mechanical Engineering, The Pennsylvania State University, University Park, PA, 16802

\*Corresponding Author: acv13@psu.edu

Reactive MD-force field: Protein force field Dec 8 2015 + Pitman

Na/Ca/Mg/C/O/H

```
39      ! Number of general parameters
50.0000 !Overcoordination parameter
 9.5469 !Overcoordination parameter
 1.6725 !Valency angle conjugation parameter
 1.7224 !Triple bond stabilisation parameter
 6.8702 !Triple bond stabilisation parameter
60.4850 !C2-correction
 1.0588 !Undercoordination parameter
 4.6000 !Triple bond stabilisation parameter
12.1176 !Undercoordination parameter
13.3056 !Undercoordination parameter
-20.0000 !Triple bond stabilization energy
 0.0000 !Lower Taper-radius
10.0000 !Upper Taper-radius
 2.8793 !Not used
33.8667 !Valency undercoordination
 6.0891 !Valency angle/lone pair parameter
 1.0563 !Valency angle
 2.0384 !Valency angle parameter
 6.1431 !Not used
 6.9290 !Double bond/angle parameter
 0.3989 !Double bond/angle parameter: overcoord
 3.9954 !Double bond/angle parameter: overcoord
-2.4837 !Not used
 5.7796 !Torsion/BO parameter
10.0000 !Torsion overcoordination
 1.9487 !Torsion overcoordination
-1.2327 !Conjugation 0 (not used)
 2.1645 !Conjugation
 1.5591 !vdWaals shielding
 0.1000 !Cutoff for bond order (*100)
```

```

1.7602 !Valency angle conjugation parameter
0.6991 !Overcoordination parameter
50.0000 !Overcoordination parameter
1.8512 !Valency/lone pair parameter
0.5000 !Not used
20.0000 !Not used
5.0000 !Molecular energy (not used)
0.0000 !Molecular energy (not used)
0.7903 !Valency angle conjugation parameter
7      ! Nr of atoms; cov.r; valency;a.m;Rvdw;Evdw;gammaEEM;cov.r2;#
      alfa;gammavdW;valency;Eunder;Eover;chiEEM;etaEEM;n.u.
      cov r3;Elp;Heat inc.;n.u.;n.u.;n.u.;n.u.
      ov/un;vall;n.u.;val3,vval4
C      1.3704   4.0000  12.0000   1.8907   0.1868   0.6388   1.1294
4.0000
      9.8017   2.1260   4.0000  30.0000  79.5548   4.9730   6.0000
0.0000
      1.2022   0.0000 197.2908   8.9856  34.9620  13.5366   0.8563
0.0000
      -2.8983   2.3275   1.0564   4.0000   2.9663   0.0000   0.0000
0.0000
H      0.8930   1.0000   1.0080   1.3550   0.0930   0.8203  -0.1000
1.0000
      8.2230  33.2894   1.0000   0.0000 121.1250   3.7248   9.6093
1.0000
      -0.1000   0.0000  55.1878   3.0408   2.4197   0.0003   1.0698
0.0000
      -19.4571  4.2733   1.0338   1.0000   2.8793   0.0000   0.0000
0.0000
O      1.2450   2.0000  15.9990   2.3890   0.1000   1.0898   1.0548
6.0000
      9.7300  13.8449   4.0000  37.5000 116.0768   8.5000   8.3122
2.0000
      0.9049   0.4056  68.0152   3.5027   0.7640   0.0021   0.9745
0.0000
      -3.5500   2.9000   1.0493   4.0000   2.9225   0.0000   0.0000
0.0000
Na     1.7878   1.0000  22.9898   2.6441   0.2588   0.8476  -1.0000
1.0000
      9.0003   2.5000   1.0000   0.0000   0.0000  -3.4731   8.1298
0.0000
      -1.0000   0.0000  23.0445 100.0000   1.0000   0.0000   0.8563
0.0000
      -4.1479   3.9900   1.0338   8.0000   2.5791   0.0010   0.0000
0.0010
Ca     1.9927   2.0000  40.0870   2.7005   0.1848   0.9605   1.0000
2.0000
      10.6123  27.5993   3.0000  38.0000   0.0000  -1.8731   6.3136
0.0000
      -1.3000   0.0000 220.0000  49.9248   0.3370   0.0000   0.0000
0.0000

```

|         |                                                       |          |          |         |         |        |         |
|---------|-------------------------------------------------------|----------|----------|---------|---------|--------|---------|
|         | -2.0000                                               | 4.0000   | 1.0564   | 6.2998  | 2.9663  | 1.4000 | 0.0100  |
| 13.0000 |                                                       |          |          |         |         |        |         |
| Mg      | 1.8330                                                | 2.0000   | 24.3050  | 2.3591  | 0.1915  | 0.5811 | 1.0000  |
| 2.0000  |                                                       |          |          |         |         |        |         |
|         | 11.0272                                               | 4.4030   | 3.0000   | 38.0000 | 0.0000  | 1.0577 | 6.1399  |
| 0.0000  |                                                       |          |          |         |         |        |         |
|         | -1.3000                                               | 0.0000   | 127.9160 | 49.9248 | 0.3370  | 0.0000 | 0.0000  |
| 0.0000  |                                                       |          |          |         |         |        |         |
|         | -8.9223                                               | 2.3663   | 1.0564   | 6.0000  | 2.9663  | 0.0000 | 0.0000  |
| 0.0000  |                                                       |          |          |         |         |        |         |
| X       | -0.1000                                               | 2.0000   | 1.0080   | 2.0000  | 0.0000  | 1.0000 | -0.1000 |
| 6.0000  |                                                       |          |          |         |         |        |         |
|         | 10.0000                                               | 2.5000   | 4.0000   | 0.0000  | 0.0000  | 8.5000 | 1.5000  |
| 0.0000  |                                                       |          |          |         |         |        |         |
|         | -0.1000                                               | 0.0000   | -2.3700  | 8.7410  | 13.3640 | 0.6690 | 0.9745  |
| 0.0000  |                                                       |          |          |         |         |        |         |
|         | -11.0000                                              | 2.7466   | 1.0338   | 4.0000  | 2.8793  | 0.0000 | 0.0000  |
| 0.0000  |                                                       |          |          |         |         |        |         |
| 19      | ! Nr of bonds; Edis1;LPpen;n.u.;pbe1;pbo5;13corr;pbo6 |          |          |         |         |        |         |
|         | pbe2;pbo3;pbo4;Etrip;pbo1;pbo2;ovcorr                 |          |          |         |         |        |         |
| 1 1     | 145.1104                                              | 93.6846  | 57.5621  | -0.6831 | -0.4472 | 1.0000 | 34.9350 |
| 0.3881  |                                                       |          |          |         |         |        |         |
|         | 0.5276                                                | -0.1073  | 9.1992   | 1.0000  | -0.0798 | 6.7209 | 1.0000  |
| 0.0000  |                                                       |          |          |         |         |        |         |
| 1 2     | 166.2175                                              | 0.0000   | 0.0000   | -0.5944 | 0.0000  | 1.0000 | 6.0000  |
| 0.5738  |                                                       |          |          |         |         |        |         |
|         | 5.3662                                                | 1.0000   | 0.0000   | 1.0000  | -0.0572 | 6.9913 | 0.0000  |
| 0.0000  |                                                       |          |          |         |         |        |         |
| 2 2     | 153.2532                                              | 0.0000   | 0.0000   | -0.4600 | 0.0000  | 1.0000 | 6.0000  |
| 0.7300  |                                                       |          |          |         |         |        |         |
|         | 6.2500                                                | 1.0000   | 0.0000   | 1.0000  | -0.0790 | 6.0552 | 0.0000  |
| 0.0000  |                                                       |          |          |         |         |        |         |
| 1 3     | 157.5526                                              | 100.1654 | 61.2014  | -0.5755 | -0.3947 | 1.0000 | 18.6775 |
| 0.4110  |                                                       |          |          |         |         |        |         |
|         | 0.9469                                                | -0.4198  | 7.9115   | 1.0000  | -0.1708 | 4.9995 | 0.0000  |
| 0.0000  |                                                       |          |          |         |         |        |         |
| 3 3     | 142.2858                                              | 145.0000 | 50.8293  | 0.2506  | -0.1000 | 1.0000 | 29.7503 |
| 0.6051  |                                                       |          |          |         |         |        |         |
|         | 0.3451                                                | -0.1055  | 9.0000   | 1.0000  | -0.1225 | 5.5000 | 1.0000  |
| 0.0000  |                                                       |          |          |         |         |        |         |
| 2 3     | 160.0000                                              | 0.0000   | 0.0000   | -0.5725 | 0.0000  | 1.0000 | 6.0000  |
| 0.5626  |                                                       |          |          |         |         |        |         |
|         | 1.1150                                                | 1.0000   | 0.0000   | 0.0000  | -0.0920 | 4.2790 | 0.0000  |
| 0.0000  |                                                       |          |          |         |         |        |         |
| 1 4     | 0.0000                                                | 0.0000   | 0.0000   | 0.4438  | -0.2034 | 1.0000 | 40.3399 |
| 0.6000  |                                                       |          |          |         |         |        |         |
|         | 0.3296                                                | -0.3153  | 9.1227   | 1.0000  | -0.1805 | 5.6864 | 1.0000  |
| 0.0000  |                                                       |          |          |         |         |        |         |
| 2 4     | 26.7569                                               | 0.0000   | 0.0000   | 1.0000  | -0.3000 | 1.0000 | 36.0000 |
| 0.0100  |                                                       |          |          |         |         |        |         |
|         | 0.5785                                                | -0.3500  | 25.0000  | 1.0000  | -0.2601 | 6.6137 | 1.0000  |
| 0.0000  |                                                       |          |          |         |         |        |         |

|         |         |                                                            |         |         |         |         |         |  |
|---------|---------|------------------------------------------------------------|---------|---------|---------|---------|---------|--|
| 3 4     | 28.0000 | 0.0000                                                     | 0.0000  | 0.4351  | -0.3000 | 1.0000  | 36.0000 |  |
| 0.0656  | 18.6859 | -0.3500                                                    | 25.0000 | 1.0000  | -0.1391 | 7.4280  | 1.0000  |  |
| 0.0000  | 4 4     | 72.6003                                                    | 0.0000  | 0.0000  | -0.7273 | 0.3000  | 25.0000 |  |
| 0.1919  | 6.6441  | -0.4000                                                    | 12.0000 | 1.0000  | -0.0345 | 5.0063  | 0.0000  |  |
| 0.0000  | 1 5     | 0.0000                                                     | 0.0000  | 0.0000  | -0.6528 | -0.3000 | 36.0000 |  |
| 0.5000  | 10.0663 | -0.3500                                                    | 25.0000 | 1.0000  | -0.1000 | 10.0000 | 0.0000  |  |
| 0.0000  | 2 5     | 0.0000                                                     | 0.0000  | 0.0000  | -0.0203 | -0.1418 | 13.1260 |  |
| 0.0230  | 8.2136  | -0.1310                                                    | 0.0000  | 1.0000  | -0.2692 | 6.4254  | 0.0000  |  |
| 24.4461 | 3 5     | 54.7436                                                    | 0.0000  | 44.9919 | 1.0000  | -0.3000 | 36.0000 |  |
| -0.0346 | 0.5457  | -0.2500                                                    | 12.0000 | 1.0000  | -0.0422 | 8.7778  | 1.0000  |  |
| 24.4461 | 4 5     | 0.1000                                                     | 0.0000  | 0.0000  | 0.5000  | -0.3000 | 16.0000 |  |
| 0.5000  | 0.5000  | -0.2500                                                    | 15.0000 | 1.0000  | -0.1000 | 9.0000  | 0.0000  |  |
| 0.0000  | 5 5     | 36.9494                                                    | 0.0000  | 0.0000  | -0.0412 | -0.2000 | 16.0000 |  |
| 0.3233  | 0.3708  | -0.2000                                                    | 10.0000 | 1.0000  | -0.0822 | 4.2104  | 0.0000  |  |
| 0.0000  | 1 6     | 0.0000                                                     | 0.0000  | 0.0000  | -0.6528 | -0.3000 | 36.0000 |  |
| 0.5000  | 10.0663 | -0.3500                                                    | 25.0000 | 1.0000  | -0.1000 | 10.0000 | 0.0000  |  |
| 0.0000  | 2 6     | 58.6896                                                    | 0.0000  | 0.0000  | -0.0203 | -0.1418 | 13.1260 |  |
| 0.0230  | 8.2136  | -0.1310                                                    | 0.0000  | 1.0000  | -0.2692 | 6.4254  | 0.0000  |  |
| 24.4461 | 3 6     | 73.0072                                                    | 0.0000  | 43.3991 | 0.8309  | -0.3000 | 36.0000 |  |
| 0.2121  | 0.5015  | -0.2500                                                    | 12.0000 | 1.0000  | -0.0545 | 6.7425  | 1.0000  |  |
| 24.4461 | 6 6     | 40.5111                                                    | 0.0000  | 0.0000  | 0.2563  | -0.2000 | 16.0000 |  |
| 0.2232  | 1.5087  | -0.2000                                                    | 10.0000 | 1.0000  | -0.1416 | 4.4975  | 0.0000  |  |
| 0.0000  | 13      | ! Nr of off-diagonal terms; Ediss;Ro;gamma;rsigma;rpi;rpi2 |         |         |         |         |         |  |
| 1 2     | 0.1206  | 1.3998                                                     | 9.8420  | 1.1177  | -1.0000 | -1.0000 |         |  |
| 2 3     | 0.0283  | 1.2885                                                     | 10.9190 | 0.9215  | -1.0000 | -1.0000 |         |  |
| 1 3     | 0.0672  | 1.8208                                                     | 10.0991 | 1.4000  | 1.1705  | 1.0634  |         |  |
| 1 4     | 0.1923  | 2.4000                                                     | 9.0446  | -1.0000 | -1.0000 | -1.0000 |         |  |
| 2 4     | 0.1100  | 1.8410                                                     | 9.1430  | 1.7735  | -1.0000 | -1.0000 |         |  |
| 3 4     | 0.1497  | 1.5719                                                     | 13.3058 | 1.6111  | -1.0000 | -1.0000 |         |  |
| 1 5     | 0.1752  | 1.0003                                                     | 14.0000 | -1.0000 | -1.0000 | -1.0000 |         |  |

|        |                                                   |        |         |          |         |         |          |         |         |
|--------|---------------------------------------------------|--------|---------|----------|---------|---------|----------|---------|---------|
| 2      | 5                                                 | 0.0100 | 1.6000  | 13.2979  | -1.0000 | -1.0000 | -1.0000  |         |         |
| 3      | 5                                                 | 0.1394 | 1.7472  | 11.8770  | 1.9198  | -1.0000 | -1.0000  |         |         |
| 4      | 5                                                 | 0.0100 | 1.4271  | 10.8031  | -1.0000 | -1.0000 | -1.0000  |         |         |
| 1      | 6                                                 | 0.4000 | 1.7604  | 14.0000  | -1.0000 | -1.0000 | -1.0000  |         |         |
| 2      | 6                                                 | 0.0100 | 1.6000  | 13.2979  | 1.8670  | -1.0000 | -1.0000  |         |         |
| 3      | 6                                                 | 0.0566 | 1.7000  | 11.6385  | 1.5120  | -1.0000 | -1.0000  |         |         |
| 39     | ! Nr of angles;at1;at2;at3;Thetao,o;ka;kb;pv1;pv2 |        |         |          |         |         |          |         |         |
| 1      | 1                                                 | 1      | 67.2380 | 40.0000  | 0.9471  | 0.0000  | 0.6938   | 14.9916 |         |
| 1.3673 | 1                                                 | 1      | 2       | 66.1046  | 14.4379 | 6.0443  | 0.0000   | 0.9851  | 0.0000  |
| 2.7063 | 2                                                 | 1      | 2       | 68.2534  | 24.9110 | 3.7590  | 0.0000   | 1.5457  | 0.0000  |
| 2.9366 | 1                                                 | 2      | 2       | 0.0000   | 0.0000  | 6.0000  | 0.0000   | 0.0000  | 0.0000  |
| 1.0400 | 1                                                 | 2      | 1       | 0.0000   | 3.4110  | 7.7350  | 0.0000   | 0.0000  | 0.0000  |
| 1.0400 | 2                                                 | 2      | 2       | 0.0000   | 27.9213 | 5.8635  | 0.0000   | 0.0000  | 0.0000  |
| 1.0400 | 1                                                 | 1      | 3       | 59.2685  | 25.8472 | 1.7572  | 0.0000   | 4.4967  | 58.6562 |
| 1.1553 | 3                                                 | 1      | 3       | 75.1448  | 11.4232 | 5.2677  | -14.2010 | 1.1419  | 0.0000  |
| 2.2364 | 2                                                 | 1      | 3       | 59.2133  | 26.6398 | 1.1864  | 0.0000   | 0.1245  | 0.0000  |
| 1.5701 | 1                                                 | 3      | 1       | 57.8946  | 31.9211 | 0.7959  | 0.0000   | 2.4921  | 0.0000  |
| 1.7123 | 1                                                 | 3      | 3       | 83.1701  | 45.0000 | 1.5698  | 0.0000   | 1.1034  | 68.1072 |
| 1.5349 | 3                                                 | 3      | 3       | 87.3324  | 15.8235 | 2.7528  | 0.0000   | 2.9390  | 0.0000  |
| 1.0000 | 1                                                 | 3      | 2       | 90.0000  | 7.3724  | 5.3059  | 0.0000   | 1.2146  | 0.0000  |
| 3.0000 | 2                                                 | 3      | 3       | 75.6935  | 50.0000 | 2.0000  | 0.0000   | 1.0000  | 0.0000  |
| 1.1680 | 2                                                 | 3      | 2       | 85.8000  | 9.8453  | 2.2720  | 0.0000   | 2.8635  | 0.0000  |
| 1.5800 | 1                                                 | 2      | 3       | 0.0000   | 19.9767 | 1.1358  | 0.0000   | 0.6225  | 0.0000  |
| 1.0432 | 3                                                 | 2      | 3       | 0.0000   | 10.7350 | 5.0000  | 0.0000   | 0.0000  | 0.0000  |
| 4.0000 | 2                                                 | 2      | 3       | 0.0000   | 8.5744  | 3.0000  | 0.0000   | 0.0000  | 0.0000  |
| 1.0421 | 3                                                 | 4      | 3       | 100.0000 | 45.9627 | 3.0941  | 0.0000   | 3.2848  | 0.0000  |
| 2.0000 | 2                                                 | 3      | 4       | 87.9313  | 7.1387  | 3.0639  | 0.0000   | 1.5000  | 0.0000  |
| 1.5554 | 4                                                 | 3      | 4       | 84.9984  | 6.4965  | 1.5553  | 0.0000   | 1.0368  | 0.0000  |
| 2.0000 | 3                                                 | 3      | 4       | 70.0000  | 25.0000 | 1.0000  | 0.0000   | 1.0000  | 0.0000  |
| 1.2500 |                                                   |        |         |          |         |         |          |         |         |

|        |                                                                |   |          |         |         |         |         |         |        |
|--------|----------------------------------------------------------------|---|----------|---------|---------|---------|---------|---------|--------|
| 1      | 3                                                              | 4 | 90.0000  | 3.3724  | 3.0000  | 0.0000  | 0.5224  | 0.0000  |        |
| 1.1707 |                                                                |   |          |         |         |         |         |         |        |
| 3      | 5                                                              | 3 | 0.2500   | 2.5141  | 2.9175  | 0.0000  | 0.7479  | 0.0000  |        |
| 1.5658 |                                                                |   |          |         |         |         |         |         |        |
| 5      | 3                                                              | 5 | 1.0000   | 1.3180  | 3.0871  | 0.0000  | 1.9285  | 0.0000  |        |
| 2.2776 |                                                                |   |          |         |         |         |         |         |        |
| 2      | 3                                                              | 5 | 51.3829  | 2.5000  | 0.2500  | 0.0000  | 0.0500  | 0.0000  |        |
| 1.0000 |                                                                |   |          |         |         |         |         |         |        |
| 3      | 3                                                              | 5 | 78.9180  | 19.1144 | 0.9887  | 0.0000  | 1.0012  | 0.0000  |        |
| 1.2276 |                                                                |   |          |         |         |         |         |         |        |
| 4      | 3                                                              | 5 | 106.3744 | 30.0000 | 3.5000  | 0.0000  | 2.8611  | 0.0000  |        |
| 3.0000 |                                                                |   |          |         |         |         |         |         |        |
| 1      | 3                                                              | 5 | 52.5052  | 24.9776 | 3.0000  | 0.0000  | 2.0000  | 0.0000  |        |
| 1.5611 |                                                                |   |          |         |         |         |         |         |        |
| 2      | 6                                                              | 2 | 0.0000   | 49.8261 | 0.2093  | 0.0000  | 2.0870  | 0.0000  |        |
| 2.2895 |                                                                |   |          |         |         |         |         |         |        |
| 2      | 2                                                              | 6 | 0.0000   | 40.0366 | 3.1505  | 0.0000  | 1.1296  | 0.0000  |        |
| 1.1110 |                                                                |   |          |         |         |         |         |         |        |
| 6      | 2                                                              | 6 | 0.0000   | 0.5047  | 0.8000  | 0.0000  | 0.8933  | 0.0000  |        |
| 4.6650 |                                                                |   |          |         |         |         |         |         |        |
| 2      | 6                                                              | 6 | 0.0000   | 8.7037  | 0.0827  | 0.0000  | 3.5597  | 0.0000  |        |
| 1.1198 |                                                                |   |          |         |         |         |         |         |        |
| 3      | 6                                                              | 3 | 0.0000   | 14.7597 | 0.1543  | 0.0000  | 1.0000  | 0.0000  |        |
| 1.0400 |                                                                |   |          |         |         |         |         |         |        |
| 6      | 3                                                              | 6 | 26.2240  | 12.7492 | 1.9545  | 0.0000  | 1.0000  | 0.0000  |        |
| 3.0000 |                                                                |   |          |         |         |         |         |         |        |
| 2      | 3                                                              | 6 | 62.5265  | 13.3742 | 3.1885  | 0.0000  | 1.0000  | 0.0000  |        |
| 1.6975 |                                                                |   |          |         |         |         |         |         |        |
| 2      | 6                                                              | 3 | 0.0000   | 35.0000 | 0.3447  | 0.0000  | 1.0000  | 0.0000  |        |
| 1.9494 |                                                                |   |          |         |         |         |         |         |        |
| 3      | 3                                                              | 6 | 70.0000  | 20.0000 | 1.0000  | 0.0000  | 1.0000  | 0.0000  |        |
| 1.2500 |                                                                |   |          |         |         |         |         |         |        |
| 1      | 3                                                              | 6 | 75.7058  | 4.5836  | 3.0000  | 0.0000  | 0.0500  | 0.0000  |        |
| 1.9315 |                                                                |   |          |         |         |         |         |         |        |
| 26     | ! Nr of torsions;at1;at2;at3;at4;;V1;V2;V3;V2 (BO);vconj;n.u;n |   |          |         |         |         |         |         |        |
| 1      | 1                                                              | 1 | 1        | -0.5000 | 38.4080 | 0.5000  | -6.1117 | -1.9481 | 0.0000 |
| 0.0000 |                                                                |   |          |         |         |         |         |         |        |
| 1      | 1                                                              | 1 | 2        | 0.4247  | 27.7539 | 0.5000  | -6.3112 | -1.9452 | 0.0000 |
| 0.0000 |                                                                |   |          |         |         |         |         |         |        |
| 2      | 1                                                              | 1 | 2        | -0.5000 | 30.7919 | 0.5000  | -5.8539 | -3.0000 | 0.0000 |
| 0.0000 |                                                                |   |          |         |         |         |         |         |        |
| 1      | 1                                                              | 1 | 3        | -0.1108 | 80.0000 | -0.5793 | -5.4405 | -1.1000 | 0.0000 |
| 0.0000 |                                                                |   |          |         |         |         |         |         |        |
| 2      | 1                                                              | 1 | 3        | -0.5732 | 28.8617 | 0.8920  | -5.1112 | -1.0978 | 0.0000 |
| 0.0000 |                                                                |   |          |         |         |         |         |         |        |
| 3      | 1                                                              | 1 | 3        | -1.7931 | 25.6020 | -1.0000 | -4.0381 | -0.8614 | 0.0000 |
| 0.0000 |                                                                |   |          |         |         |         |         |         |        |
| 1      | 1                                                              | 3 | 1        | 1.0000  | 59.3911 | -0.5000 | -2.7048 | -0.9000 | 0.0000 |
| 0.0000 |                                                                |   |          |         |         |         |         |         |        |
| 1      | 1                                                              | 3 | 2        | -0.1141 | 5.0000  | -1.0000 | -8.1021 | -0.9000 | 0.0000 |
| 0.0000 |                                                                |   |          |         |         |         |         |         |        |

|        |   |   |   |                                                  |          |         |         |         |        |  |  |
|--------|---|---|---|--------------------------------------------------|----------|---------|---------|---------|--------|--|--|
| 2      | 1 | 3 | 1 | 2.5000                                           | 15.2653  | 0.8965  | -2.5000 | -0.9000 | 0.0000 |  |  |
| 0.0000 |   |   |   |                                                  |          |         |         |         |        |  |  |
| 2      | 1 | 3 | 2 | -2.5000                                          | 37.1322  | 0.4144  | -4.6988 | -1.1000 | 0.0000 |  |  |
| 0.0000 |   |   |   |                                                  |          |         |         |         |        |  |  |
| 2      | 1 | 3 | 3 | 0.8151                                           | 100.0000 | 1.0000  | -3.4409 | -2.8274 | 0.0000 |  |  |
| 0.0000 |   |   |   |                                                  |          |         |         |         |        |  |  |
| 3      | 1 | 3 | 1 | 0.5406                                           | 16.8262  | 0.4979  | -8.2524 | -3.0437 | 0.0000 |  |  |
| 0.0000 |   |   |   |                                                  |          |         |         |         |        |  |  |
| 3      | 1 | 3 | 2 | 2.4679                                           | 16.0446  | -0.3246 | -2.5000 | -3.0476 | 0.0000 |  |  |
| 0.0000 |   |   |   |                                                  |          |         |         |         |        |  |  |
| 1      | 3 | 3 | 2 | -2.5000                                          | 7.3697   | -1.0000 | -4.1837 | -2.9498 | 0.0000 |  |  |
| 0.0000 |   |   |   |                                                  |          |         |         |         |        |  |  |
| 2      | 3 | 3 | 2 | -2.5000                                          | -25.0000 | -1.0000 | -2.5000 | 0.0000  | 0.0000 |  |  |
| 0.0000 |   |   |   |                                                  |          |         |         |         |        |  |  |
| 1      | 3 | 3 | 3 | 2.5000                                           | -24.1204 | 1.0000  | -3.2189 | -0.9972 | 0.0000 |  |  |
| 0.0000 |   |   |   |                                                  |          |         |         |         |        |  |  |
| 2      | 3 | 3 | 3 | -2.0407                                          | 80.0000  | -0.9677 | -7.0890 | 0.0000  | 0.0000 |  |  |
| 0.0000 |   |   |   |                                                  |          |         |         |         |        |  |  |
| 3      | 3 | 3 | 3 | -2.5000                                          | -25.0000 | 1.0000  | -2.5000 | -0.9000 | 0.0000 |  |  |
| 0.0000 |   |   |   |                                                  |          |         |         |         |        |  |  |
| 0      | 1 | 2 | 0 | 2.0735                                           | 0.1000   | 0.0100  | -4.0000 | 0.0000  | 0.0000 |  |  |
| 0.0000 |   |   |   |                                                  |          |         |         |         |        |  |  |
| 0      | 2 | 2 | 0 | 0.0000                                           | 0.1000   | 0.0100  | -4.0000 | 0.0000  | 0.0000 |  |  |
| 0.0000 |   |   |   |                                                  |          |         |         |         |        |  |  |
| 0      | 2 | 3 | 0 | 0.0000                                           | 0.1000   | 0.0200  | -4.0000 | 0.0000  | 0.0000 |  |  |
| 0.0000 |   |   |   |                                                  |          |         |         |         |        |  |  |
| 0      | 1 | 1 | 0 | 0.0000                                           | 50.0000  | 0.3000  | -4.0000 | -2.0000 | 0.0000 |  |  |
| 0.0000 |   |   |   |                                                  |          |         |         |         |        |  |  |
| 0      | 3 | 3 | 0 | 0.5511                                           | 25.4150  | 1.1330  | -5.1903 | -1.0000 | 0.0000 |  |  |
| 0.0000 |   |   |   |                                                  |          |         |         |         |        |  |  |
| 1      | 1 | 3 | 3 | -0.0002                                          | 20.1851  | 0.1601  | -9.0000 | -2.0000 | 0.0000 |  |  |
| 0.0000 |   |   |   |                                                  |          |         |         |         |        |  |  |
| 1      | 3 | 3 | 1 | 0.0002                                           | 80.0000  | -1.5000 | -4.4848 | -2.0000 | 0.0000 |  |  |
| 0.0000 |   |   |   |                                                  |          |         |         |         |        |  |  |
| 3      | 1 | 3 | 3 | -0.1583                                          | 20.0000  | 1.5000  | -9.0000 | -2.0000 | 0.0000 |  |  |
| 0.0000 |   |   |   |                                                  |          |         |         |         |        |  |  |
| 1      |   |   |   | ! Nr of hydrogen bonds;at1;at2;at3;Rhb;Dehb;vhb1 |          |         |         |         |        |  |  |
| 3      | 2 | 3 |   | 2.1200                                           | -3.5800  | 1.4500  | 19.5000 |         |        |  |  |
